# Supplementary material for: Rabbit Monoclonal Antibody Specifically Recognizing a Linear Epitope in the RBD of SARS-CoV-2 Spike Protein
Source: MDPI journal article supplement (doi:10.3390/vaccines9080829), 2021-07-28
Supplement: s1 [file s1]

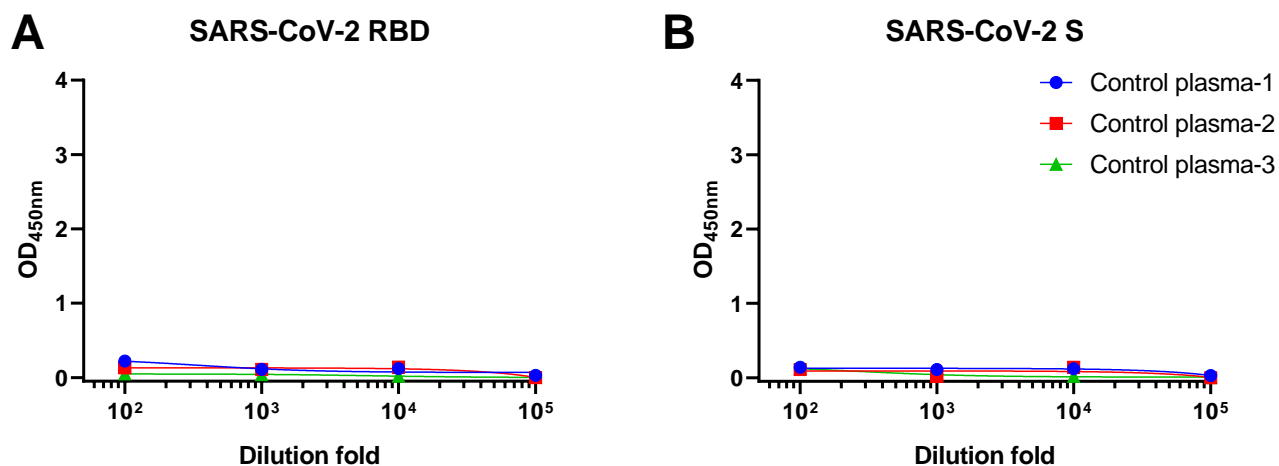

**Figure S1. RBD and S protein ELISA reactivity with plasma from healthy donors.**

The reactivity of healthy human plasma against SARS-CoV-2 RBD and S protein was assessed by ELISA assay.

| Name         | Sequence                                                                                                                                                                                                                                                                                                                                                                                                                                                                                                                                                                         |
|--------------|----------------------------------------------------------------------------------------------------------------------------------------------------------------------------------------------------------------------------------------------------------------------------------------------------------------------------------------------------------------------------------------------------------------------------------------------------------------------------------------------------------------------------------------------------------------------------------|
| 316-549(RBD) | SNFRVQPTESIVRFPNITNLCPFGEVFNATRFASVYAWNRRKRISNCVADYSVLVNSASFSTFKCYGVSPTKLNDLCFTNVYADSFVIRGDEVQRQIAPGQTGKIADYNYKLPPDFTGCVIAWNSNNLDSKVGGNYYLYRLFRKSNLKPFERDISTEIYQAGSTP <b>CNGVEGFNCYFPL</b> LQSYGFQPTNGVGYPYRVVLSFELLHAPATVCGPKKSTNLVKNKCVNFNFNGLTGTGVLTESNKKFLPFQQFGRDIADTTDAVRDPQTLEILDITPCSFGGVSVITPGTNTSNQVAVLYQDVNCTEVPVAIHADQLTPTWRVYSTGSNVFQTRAGCLIGAEHVNNSYECDIPIGAGICASYQTQTNSPRRARSVASQSIIAYTMSLGAENSVAYSNNNSIAIPTNFTISVTTEILPVSMTKTSVDCTMYICGDSSTECNLLLQYGSFCTQLNRALTGIAVEQDKNTQEVFAQVKQIYKTPPIKDFGGFNFSQILPDPSKPSKRISFIEDLLFNKVTLADAGFIKQYGDCLGDIAARDLICAQKFNGLTVLPPL |
| S-316-415    | SNFRVQPTESIVRFPNITNLCPFGEVFNATRFASVYAWNRRKRISNCVADYSVLVNSASFSTFKCYGVSPTKLNDLCFTNVYADSFVIRGDEVQRQIAPGQT                                                                                                                                                                                                                                                                                                                                                                                                                                                                           |
| S-346-445    | RFASVYAWNRRKRISNCVADYSVLVNSASFSTFKCYGVSPTKLNDLCFTNVYADSFVIRGDEVQRQIAPGQTGKIADYNYKLPPDFTGCVIAWNSNNLDSKV                                                                                                                                                                                                                                                                                                                                                                                                                                                                           |
| S-376-475    | TFKCYGVSPTKLNDLCFTNVYADSFVIRGDEVQRQIAPGQTGKIADYNYKLPPDFTGCVIAWNSNNLDSKVGGNYYLYRLFRKSNLKPFERDISTEIYQA                                                                                                                                                                                                                                                                                                                                                                                                                                                                             |
| S-406-505    | EVRQIAPGQTGKIADYNYKLPPDFTGCVIAWNSNNLDSKVGGNYYLYRLFRKSNLKPFERDISTEIYQAGSTP <b>CNGVEGFNCYFPL</b> LQSYGFQPTNGVGYPYRVVLSFELLHAPATVCGPKKSTNLVK                                                                                                                                                                                                                                                                                                                                                                                                                                        |
| S-436-535    | WNSNNLDSKVGGNYYLYRLFRKSNLKPFERDISTEIYQAGSTP <b>CNGVEGFNCYFPL</b> LQSYGFQPTNGVGYPYRVVLSFELLHAPATVCGPKKSTNLVK                                                                                                                                                                                                                                                                                                                                                                                                                                                                      |
| S-466-549    | RDISTEIYQAGSTP <b>CNGVEGFNCYFPL</b> LQSYGFQPTNGVGYPYRVVLSFELLHAPATVCGPKKSTNLVKNKCVNFNFNGLTGT                                                                                                                                                                                                                                                                                                                                                                                                                                                                                     |
| S-466-485    | RDISTEIYQAGSTPCNGVEG                                                                                                                                                                                                                                                                                                                                                                                                                                                                                                                                                             |
| S-476-495    | GST <b>PCNGVEGFNCYFPL</b> LQSY                                                                                                                                                                                                                                                                                                                                                                                                                                                                                                                                                   |
| S-486-505    | FNCYFPLQSYGFQPTNGVGYPYRVVLSFELLHAPATVCGPKKSTNLVK                                                                                                                                                                                                                                                                                                                                                                                                                                                                                                                                 |
| S-476-486    | GSTPCNGVEGF                                                                                                                                                                                                                                                                                                                                                                                                                                                                                                                                                                      |
| S-476-487    | GSTPCNGVEGFN                                                                                                                                                                                                                                                                                                                                                                                                                                                                                                                                                                     |
| S-476-488    | GSTPCNGVEGFNC                                                                                                                                                                                                                                                                                                                                                                                                                                                                                                                                                                    |
| S-476-489    | GSTPCNGVEGFNCY                                                                                                                                                                                                                                                                                                                                                                                                                                                                                                                                                                   |
| S-476-490    | GSTPCNGVEGFNCYF                                                                                                                                                                                                                                                                                                                                                                                                                                                                                                                                                                  |
| S-476-491    | GSTP <b>CNGVEGFNCYFPL</b>                                                                                                                                                                                                                                                                                                                                                                                                                                                                                                                                                        |
| S-476-492    | GSTP <b>CNGVEGFNCYFPL</b>                                                                                                                                                                                                                                                                                                                                                                                                                                                                                                                                                        |
| S-476-493    | GSTP <b>CNGVEGFNCYFPL</b> Q                                                                                                                                                                                                                                                                                                                                                                                                                                                                                                                                                      |
| S-476-494    | GSTP <b>CNGVEGFNCYFPL</b> QSY                                                                                                                                                                                                                                                                                                                                                                                                                                                                                                                                                    |
| S-476-495    | GSTP <b>CNGVEGFNCYFPL</b> QSY                                                                                                                                                                                                                                                                                                                                                                                                                                                                                                                                                    |
| S-477-495    | STP <b>CNGVEGFNCYFPL</b> QSY                                                                                                                                                                                                                                                                                                                                                                                                                                                                                                                                                     |
| S-478-495    | TP <b>CNGVEGFNCYFPL</b> QSY                                                                                                                                                                                                                                                                                                                                                                                                                                                                                                                                                      |
| S-479-495    | P <b>CNGVEGFNCYFPL</b> QSY                                                                                                                                                                                                                                                                                                                                                                                                                                                                                                                                                       |
| S-480-495    | <b>CNGVEGFNCYFPL</b> QSY                                                                                                                                                                                                                                                                                                                                                                                                                                                                                                                                                         |
| S-481-495    | NGVEGFNCYFPLQSY                                                                                                                                                                                                                                                                                                                                                                                                                                                                                                                                                                  |
| S-482-495    | GVEGFNCYFPLQSY                                                                                                                                                                                                                                                                                                                                                                                                                                                                                                                                                                   |
| S-483-495    | VEGFNCYFPLQSY                                                                                                                                                                                                                                                                                                                                                                                                                                                                                                                                                                    |
| S-484-495    | EGFNCYFPLQSY                                                                                                                                                                                                                                                                                                                                                                                                                                                                                                                                                                     |
| S-485-495    | GFNCYFPLQSY                                                                                                                                                                                                                                                                                                                                                                                                                                                                                                                                                                      |
| S-486-495    | FNCYFPLQSY                                                                                                                                                                                                                                                                                                                                                                                                                                                                                                                                                                       |

**Table S1. The summary of SARS-CoV-2 RBD and truncated peptide sequences.**

The sequences recognized by 9E1 are colored in red.

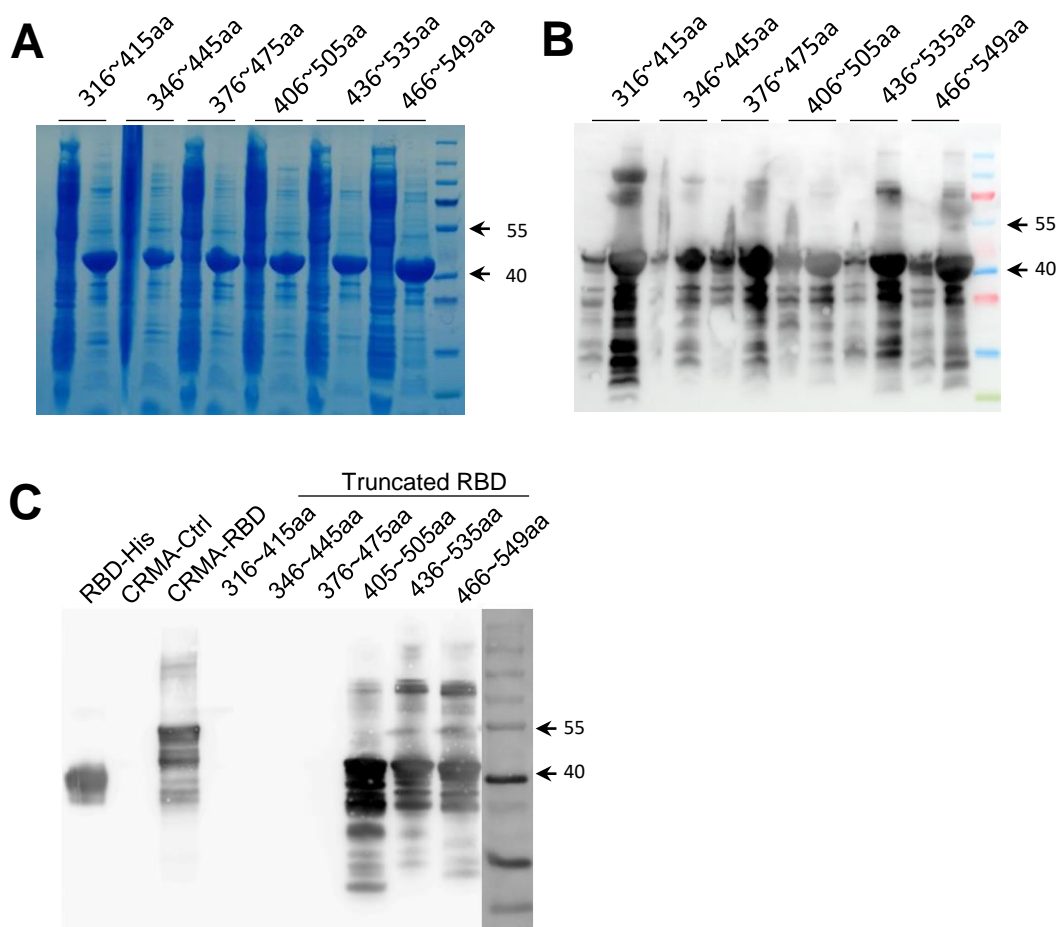

**Figure S2. Analysis of recombinant CRMA-fused truncated RBD proteins.**

CRMA-fused truncated RBD proteins were evaluated by SDS-PAGE(A) and Western blot(B) with anti-His polyAb. CRMA-fused protein plasmids were transformed into *E.coli* ER2566 and induced by IPTG for 8 hours. For a truncated protein, the left lane represented supernatant of induced *E.coli* after ultrasonication and the lane right represented inclusion body of induced *E.coli* after ultrasonication.

(C)Western blot analysis of 9E1 against CRMA-fused truncated RBD proteins.RBD-His expressed by 293F and CRMA-RBD expressed by *E.coli* were used as positive control. CRMA protein was used as negative control. 9E1 was diluted at 1μg/mL.

**A**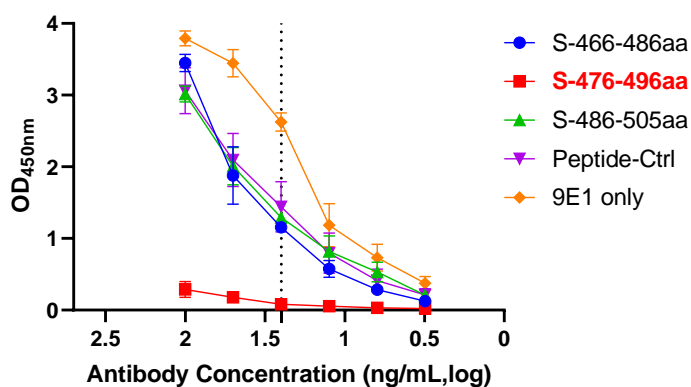**B**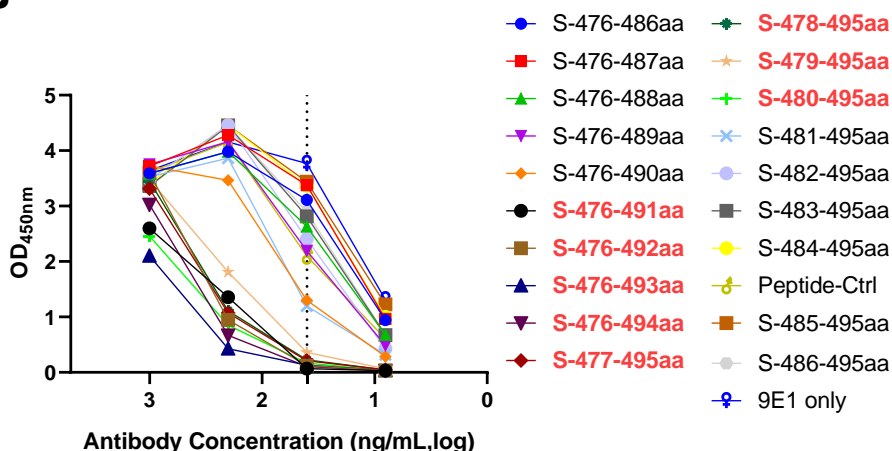**C**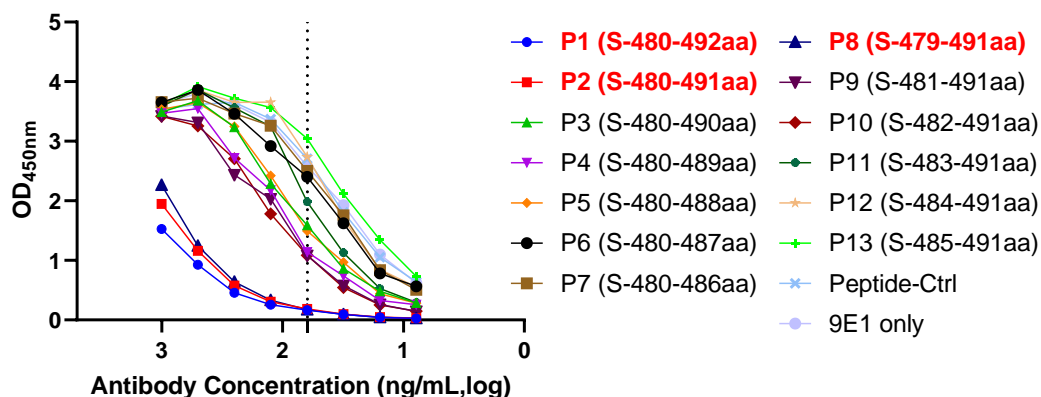

**Figure S3. Competition ELISA of 9E1 against truncated peptides.**

Synthesized peptides(1 $\mu$ g) were precubated with 9E1-HRP and the reactivity of the mixture was evaluated with ELISA assay as described in Materials and Methods. The OD values marked by dotted lines were display in Figure 4.

Figure S5

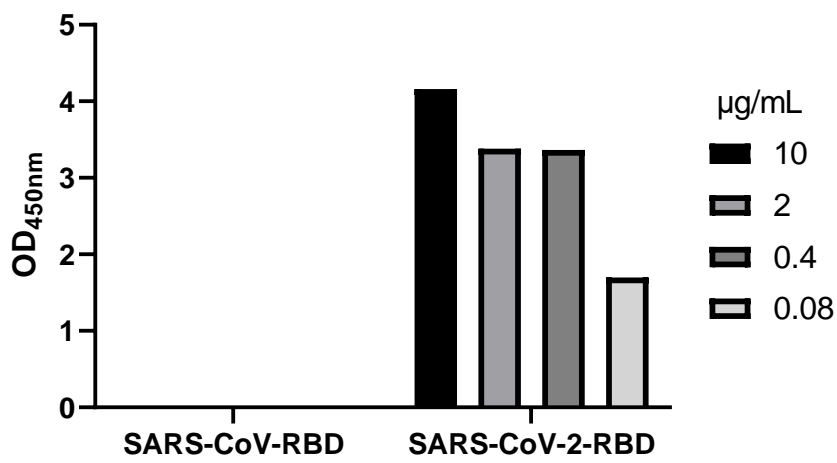

**Figure S4. ELISA reactivity of 9E1 against SARS-CoV RBD protein.**

9E1 was serially diluted and evaluated for reactivity against SARS-CoV-2 and SARS-CoV RBD proteins.

1 10 20 30 40 50 60 70  
SARS-CoV-2 .....MFVFVLLPLVSS...QCVNLTRTQLPFAAYTNSFTRGVYYPDKVFRRSSVLHSQTQDLFLPFPSNVTFWFHAIHVS...N  
SARS-CoV .....MFIFLFLTLTSGSGLDRCTTFDDVQAPNYTQHTSSMRGVYYPDEIFRSDTLYLTLQDLFLPFPSNVTFGFHTLNHT.....  
HCoV-OC43 .....MFLTLTLTAFVIGDLKCTSDNINDKDTGPPFISTCTVGVNGLGTYYVLDRLVYLTNTLTLFLNGYYPTSGSTYRNMAKGSVLL  
HCoV-HKU1 .....MFLTLTLTAVIGDPNCTNSFINDYNNKTIIPRISEJVDVSLGLGTYYVLNRYVLTNTLTLFTGYFPKSGANFRDLAKGSYIL  
HCoV-229E .....MKLFLTLTLVPLASCFCTCNSNANSMILQLGVPDSSSTIVTGLPTHRWFCANQSTSVYSANGEFYTDVGNHRSAPALHTGY  
HCoV-NL63 .....MKLFLTLTLVPLASCFCTCNSNANSMILQLGVPDSSSTIVTGLPTHRWFCANQSTSVYSANGEFYTDVGNHRSAPALHTGY  
MERS-CoV MIESVFLMLTLTPTESYVDVGPDSVKSACIEVDIQQTFFDKTWPRIPIVSKADGIIYVQGRYTSNITLITYQGLFPYQGDHGDYVYSAGHAT

80 90  
SARS-CoV-2 GTRKFDN?VLPFNDG.....VY  
SARS-CoV .....FGN?VLPFKDG.....IY  
HCoV-OC43 SRLWFKPPFLSDFIN.....GI  
HCoV-HKU1 STLWYKPPFLSDFNN.....GI  
HCoV-229E .....  
HCoV-NL63 DANQYLYIVTINIGLNASVTKICKFSRNTTFDFLSNASSSFDCLVNLFLTEQGAPLGITISGETVRLHLYNVTRFYPVPAAYKCLKLSVKC  
MERS-CoV GTTPQKLFVANYSQDVRFQFANG.....FVVRIGAAANSTGTVIISP

100 110 120 130 140 150 160 170 180  
SARS-CoV-2 FASTEKSNIIRGWIFGTTLDSKTQSLIIVNNATNVVILKVCLEFQFCNDPFLGVYHKNNKSWMESERFVYSSANNCTFEYVSQPFLLMDLEGKQG  
SARS-CoV FAATEKSNVVRGWVFGSTMMNKSSQSVIIINNSTNVVILRACNFELCNPFFAVSKPMG...TQHTMIFDNFNACTFEYISDAFSLDVSEKSG  
HCoV-OC43 FARVKNTKVIKDRVMYSEFPATITIGSTFVNNTSYSVVVQPRITNSTQD.GDNKLGILEVSVCCVNMCEYPQTICHPNLGNHRKELWHLDTGVV  
HCoV-HKU1 FSKVKNTKLYVNNNTLYSEFSTIVIGSVFVNNTSYTIVVQP.....HNGILEITACQYTMCEYPHTVCKS.KGSIRNESWHIDSSEP  
HCoV-229E ...MFVLLVAYALLHIAACQTTNGLNTSYSYCNCGCVGYSENVFAVESGGYIPSDFAFNWFLLTNTSSVVDGVVRSFQPLLNLCLWSVGLRF  
HCoV-NL63 YPNYSQVSVVNNATVTVNVTITNNGRVVNYTYCDDCNGYIDNLFVSQODGRLPNGEFFFNWFLLTNGSILVDGVSRLYQPLRLTCLWVPCLSK  
MERS-CoV STSATIRKLYPAPMLGSSVGNFSDBGMRGFNHTLVLLLPDGCCTLLRAFYCILEPRSGNHCPACONSYYSFATYHTPATDCSGNYNRNASLNS

190 200 210 220 230 240 250 260 270  
SARS-CoV-2 NFKNLRFTVFKNIDGVFKIYSKIHTPINLVRDLPGQGSALERLVDLPLGINITRFTLLALERSYLT...PGDSSSGWTAGAAAYVGYLQF  
SARS-CoV NFKHLREFTVFKNKDGLVYVKCYQPIDVVRDLPSGFNTLKEIFKLPLGINITNFRAILTAFS.....PAQDIWGTSAAYVFCYLLKLP  
HCoV-OC43 SCLYKRNFTYDVNADLYFHFYQEGGTFYAYFTDTGVVTKELFNVYLGMLLSHYVVMPLTCN.....SKLT.....LEYWVTPLLTS  
HCoV-HKU1 LCLFKKNTTYNVSADLYFHFYQERGTFYAYADVCMPITELFSLYLGLTILSHYVVMPLTCN.....AISNIDKNETLEYWVTPLLSR  
HCoV-229E TTEGFVYFNGTGRGD.CKGFSSDVLSDVIRYNLNFEN...LRRGTILFKTSYGVVVFYCTN.....NTLVSGDAHIFFGTIVLGNF  
HCoV-NL63 STGEFVYFNATGSDVNCNGYQHSVVDVMRYNLNLFANSCLDNLKSGLVIVFKLQYDVLLEYCSN.....SSSGVLDHTIPFGPSSQPY  
MERS-CoV KKEVFNLRNCTFMYTYNITTEDEILEWFGITQTAQGVHFLSSRYVDLYCGNMFQFATLPPVYDTIKYYSITPHSTRSTQSDRKAAAFVYKYLQF

280 290 300 310 320 330 340 350 360  
SARS-CoV-2 RTFLLKYNNENGITTDAVDCALDPLSEETKCTLKSTFVERGIYQTSNFRVQPCESIVRFPNITNLCPFGFVFNATRFASVYAWNRKRISNCVADY  
SARS-CoV RTFMLKKYDENGITTDAVDCSSQNPFLAEIKCSVKSFETDKGIYQTSNFRVQPCESIVRFPNITNLCPFGFVFNATKFPVSYAWNRKRISNCVADY  
HCoV-OC43 RQYLLANQDGTIFNAEDCMSDFEIKCKTQSIAPPKTGYVELNGYITVQPIADVYRRKPNLPNCNIEAWLNDKSVSPFLNWERKRTFNCNFM  
HCoV-HKU1 RQYLLANQDGTIFNAEDCMSDFEIKCKTQSIAPPKTGYVELNGYITVQPIADVYRRKPNLPNCNIEAWLNDKSVSPFLNWERKRTFNCNFM  
HCoV-229E RQYLLANQDGTIFNAEDCMSDFEIKCKTQSIAPPKTGYVELNGYITVQPIADVYRRKPNLPNCNIEAWLNDKSVSPFLNWERKRTFNCNFM  
HCoV-NL63 YCFINSTITNTIVSTFVCILPPIVREIVVARTCQFYINGCYFDFGLFIEAVNFNVTTIASATDFTVAFATFVDVLVNVVSATNQNLLYCDSPF  
MERS-CoV LTFLLDFSVDGIVRRRVIDCAGFNDLSQLHCSYEFSDVRESGVYSVSEFAKESGSGVVEQAAGVECCFSPILSG...TPPQVYVNFRLVFTNCNYNL

370 380 390 400 410 420 430 440 450  
SARS-CoV-2 SVTYNNSASFSTFKCYCVSPTRKNDLCTFTNVYADSFVIRGDEVROITAPGQTGKIADYNYKLPDDFTTCVIAWNSNNLDSKVG...GNINYLYR  
SARS-CoV SVTYNNSFTFFSTFKCYGVSAATKLNLDLCTFSNVYADSFVIRGDDVROITAPGQTGVIADYNYKLPDDFMGCVLAWNTRNIDATST...GNINYKYR  
HCoV-OC43 SSIMSFIAQDSFTCNNDIAAKIYGMCFSSITIDKFAIPNGRKVDLQLGNLGYLQSFNYRIDTTATSCOLYYNLFAANVSVRFNPSVWNRRYRG  
HCoV-HKU1 STDLRLVHVDSFSCNNLDKSKIFGSCFNSITVDKFAIPNRRRDDQLGSGSGFLQSSNYKIDISSSSCOLYYSLPLVNVTTIKYFNPSVWNRRYRG  
HCoV-229E NRRRCQDQLSDFVDFGFTSTPISQSVLPLVSIIVSLPVIYHKHTFIVLYVDFKPKQSGGKCFNCPYAGVNNITLANFNETKGPLCVDTSHTTKYV  
HCoV-NL63 ERLQCEHLQFGLQDGFYSANPLDDNVLP.ETTYVALPIYYQHTDINTATAS...FGGSCYVCKPHQVNNISLN...GNTSVCVRTSFSIRYI  
MERS-CoV TRKLLSLFSVNDFTCSQISPAALASNCYSSLLDYFESYPLSKSDDLVSVSAGPIITQFNYKQSFSNPTCLILATVPHNLTITIKPLKYSYINKCS

460 470 480 490 500 510  
SARS-CoV-2 LFRKSNLKFPERDISTEIIYQAGSTPENGVEGNCYFELQSYGFGPTNGVG.....YQPYRVVVLSEFL  
SARS-CoV YLRHGKLPFERDISNVPPSPDGKPCET.PPALNCYWLNDYGVGYITTGIG.....YQPYRVVVLSEFL  
HCoV-OC43 FIEDSVFKPRPAGVLTNHDVVYAQHCFAKPNKFCCKLNGSCVGSQPGKNNIGITCPAGTNYLTCDN.....LCTPDPITCTGTGY  
HCoV-HKU1 FGSENLNLS...SYDMVYSDECFSVNSDFCPADP.SVNSSCAKRPPSAICPAGTKYRCDLDTLYVKNWCRCSCLPDPITSTYSPT  
HCoV-229E AVYANVG...RWSASINTGNCFFSPGKVNNEVFKPCSVCSLKDIPGCCAMPVAN.....WAYSKEYITGSLYVS  
HCoV-NL63 YNRVKSQSGPDSSWHYLYKSGTCPPBFSKLNFPQKPTTICFTSTVFVPGCCNFPK.RAT.....WHYSYTYIGATVYV  
MERS-CoV RLLSDRTEVPQLVNAQYISPCVSIYFSTVWEDGMYRKQLSPLLEGGLWVASSTVAMT.....EQQLQMCGGITVQY

520 530 540  
SARS-CoV-2 LHAPA**TV**CGP.....KKS**TN**L**V**KN**K****CV**N**FN**FN  
SARS-CoV LHAPA**TV**CGP.....KLS**TD**L**L**KN**K****CV**N**FN**FN  
HCoV-OC43 CPQ**TK****SL**V**G**IG**EH**CS**GL**AV**KSD**Y**CG**NS.....CTCR**PQ**AE**L**GW**SAD**SC**LQ**GD**KCN**IFAN**FIL**H**DV**NS**GL**TC**SD**LQ**KAN****TD**L**L**GV**CV**N**YD**LY  
HCoV-HKU1 CPQ**KKV**V**G**IG**EH**CP**GL**INE**EC**GT**QL**NH**SS**CF**SP**DA**FL**GW**SF**DS**IS**NN**RC**NI**FS**NI**FI**NG**INS**GT**CS**ND**LL**Y**NT**E**IS**TV**CV**N**YD**LY  
HCoV-229E WSD**GD**G**IT**G**VP**Q**P**VE**G**.....VSS**FM**K**VT**L**KC**IT**KY**NI**Y**  
HCoV-NL63 W**SF**GN**S**IT**G**VP**Y**PS**G**.....ITREF**SN**L**V**LN**NC**IT**KY**NI**Y**  
MERS-CoV GTD**TN****SV**CP**E**K**L**E**FAN**.....DTK**IA**S**QL**GN**CV**E**YS**LY

550 560 570 580 590 600 610 620 630  
SARS-CoV-2 GL**TCT**GV**LT**ES**NKK**FL**P**.F**Q**Q**FR**D**TD**T**T**AV**RD**P**OT**LE**ILD**IT**PC**S**F**GG**VS**VI**TP**GT**NT**SN**QV**AV**LY**Q**D**V**NC**TE**VP**FA**I**H**AD**Q**L**T**P**TR**W**Y**Y**  
SARS-CoV GL**TCT**GV**LT**PS**SK**R**F**Q**P**.F**Q**Q**FR**D**VS**D**FT**DS**VR**D**PK**TSE**ILD**IS**PC**S**F**GG**VS**VI**TP**GT**NT**AS**SE**V**AV**LY**Q**D**V**NC**TD**V**ST**AI**H**AD**Q**L**T**P**AW**RI**Y**  
HCoV-OC43 GI**IC**Q**CI**F**VE**V**N**AT**Y**Y**NS**W**Q**N**LL**Y**DS**NG**N**LY**CF**RD**Y**I**IN**RT**FM**IR**SC**Y**S**GR**VS**AA**F**AN**..**SS**EP**AL**L**FR**NI**CK**NY**V**FN**NS**L**TR**Q**L**P**IN**Y**FD  
HCoV-HKU1 GI**TC**Q**CI**F**KE**VS**AA**Y**Y**NN**W**Q**N**LL**Y**DS**NG**N**LI**G**FK**DE**L**IN**K**I**Y**IT**L**PC**Y**S**GR**VS**AA**PY**QN**..SS**SP**AL**L**Y**R**N**L**K**C**SY**V**LN**..**IS**F**IS**Q**P**Y**FD  
HCoV-229E D**VS**GV**GV**LR**VS**ND**T**FL**N**..G**IT**Y**TS**GN**L**G**FK**D**VT**K**GI**Y**SI**TP**CN**FP**D**Q**L**V**Y**Q**Q**AV**V**G**AM**L**SEN**TS**Y**GF**SN**V**EL**PK**FF**Y**AS**NG**T**Y**NC**  
HCoV-NL63 D**Y**V**GT**GT**L**RS**SN**Q**SL**AG**..**G**IT**Y**VS**NS**GN**L**G**FK**N**V**ST**GN**IF**IT**PC**N**FP**D**Q**V**AV**Y**Q**Q**SI**IG**AM**T**AV**NE**S**RY**GL**Q**N**L**QL**P**FF**Y**VS**NG**G**NC  
MERS-CoV G**VS**GR**GV**F**Q**NC**T**AV**GV**R**..**Q**Q**RF**V**Y**D**AM**Q**N**L**V**G**Y**S**DD**G**NY**Y**CL**AC**VS**VE**VS**VI**Y**D**KE**TK**TH**AT**L**EG**S**V**ACE**HI**SS**IM**S**Q**Y**S**RS**TR**SM**L**K**R**RD

640 650 660 670 680 690 700 710 720  
SARS-CoV-2 ST**GS**N**V**F**Q**TR**AG**CL**IG**AE**H**V**NS**Y**E**CD**IP**IG**AG**IC**AS**Y**Q**QT**NS**FR**ARS**VS**AS**Q**SI**AY**TM**SL**GA**EN**SV**AYS**NN**...**S**IA**IP**T**N**FT**IS**VT**BE**  
SARS-CoV ST**GS**NN**V**F**Q**TA**GC**CL**IG**AE**H**VD**TS**Y**E**CD**IP**IG**AG**IC**AS**Y**HT**VS...**L**LR**ST**S**Q**KS**IV**AY**TM**SL**G**AD**SS**I**AY**SN**..**...**I**AI**PT**N**FS**IS**IT**TE  
HCoV-OC43 SY**L**GC**V**Y**N**AY**N**...**S**TA**IS**V**QT**CD**LT**V**GS**GY**CV**D**YS**K**..**N**RR**SR**GA**IT**T**GY**RF**T**NE**FP**FT**V**NS**V**ND**S**LE**PW**GG**L**VE**I**Q**IP**SE**FT**IGN**MY**E**  
HCoV-HKU1 SY**L**GC**V**Y**N**AV**N**...**L**TS**Y**SV**SS**CD**LR**MS**SG**FC**ID**Y**AL**P**SS**R**R**K**R**RG**IS**SP**Y**RF**VT**TE**FP**FN**VS**F**V**ND**S**VE**TV**GG**L**FE**I**Q**IP**T**N**FT**IA**GH**BE**  
HCoV-229E TDA**VL**TY**VS**FG...**V**CAD**GS**IA**AV**Q**PN**VS**YD**SV**AI**VT**AN**...**L**SS**IP**SN**WT**TS**VQ**VE  
HCoV-NL63 TTA**VM**IT**YS**NG**..**...**L**CAD**GS**L**IP**VR**PN**KS**SD**NC**IS**AI**TAN**...**L**SS**IP**SN**WT**TS**VQ**VE  
MERS-CoV ST**Y**GP**L**Q**TP**V**GC**V**L**GL**V**NS**SL**F**VED**CR**LP**L**Q**Q**SL**CA**LP**DT**FT**SL**TP**RS**VR**SV**PE**MR**LA**SI**AF**N**HP**I**Q**V**D**Q**LN**SY**..**FK**LS**IP**T**N**FS**FG**V**Q**BE**

730 740 750 760 770 780 790 800  
SARS-CoV-2 IL**FP**VS**MT**K**TS**VD**CT**MY**IC**GD**ST**E**CS**N**LL**LO**Y**GS**FC**IT**QL**N**R**AL**TG**TA**VE**Q**D**KN**TQ**EV**FA**Q**V**K**Q**...**I**Y**K**TP**FP**IK**DF**GG**FN**EQ**IL**PD**...**  
SARS-CoV VMP**VS**MA**K**TS**VD**CN**MY**IC**GD**ST**E**CAN**LL**LO**Y**GS**FC**IT**QL**N**R**AL**SG**IA**AE**Q**DR**NT**RE**V**FA**Q**V**K**Q**...**I**MY**K**TP**FP**IK**DF**GG**FN**EQ**IL**PD**...**  
HCoV-OC43 FI**QT**SS**PK**VT**ID**CA**AF**Y**CG**D**Y**AA**CK**SL**VE**Y**GS**FC**IN**IN**AL**TE**VE**N**ELL**D**IT**Q**Q**V**AN**SL**LM**GV**TL**ST**KL**K**D**GV**FN**V**D**DI**NE**SP**VL**GC**LG**SE  
HCoV-HKU1 FI**QT**SS**PK**VT**ID**CA**AF**Y**CG**D**Y**AA**CK**SL**VE**Y**GS**FC**IN**IN**AL**TE**VE**N**ELL**D**IT**Q**Q**V**AN**SL**LM**GV**TL**ST**KL**K**D**GV**FN**V**D**DI**NE**SP**VL**GC**LG**SE  
HCoV-229E YL**Q**IT**TS**TP**IV**VO**CT**Y**VC**NG**N**VR**CV**EL**L**K**Q**Y**TS**ACT**IED**AL**R**NS**AR**LE**S**AD**VS**E**ML**TD**DK**...**A**FT**LAN**V**TS**FG**D**Y**NE**SS**VP**SL**PT**S  
HCoV-NL63 YL**Q**IT**TS**TP**IV**VO**CT**Y**VC**NG**N**VR**CV**EL**L**K**Q**Y**TS**ACT**IED**AL**R**NS**AR**LE**S**AD**VS**E**ML**TD**DK**...**A**FT**LAN**V**TS**FG**D**Y**NE**SS**VP**SL**PT**S  
MERS-CoV YI**Q**IT**TI**Q**K**VT**VD**CK**Q**Y**VC**NG**F**Q**K**CE**QL**LR**Y**Q**GF**CS**K**IN**Q**AL**H**GAN**L**R**Q**DD**SV**R**N**L**F**AS**V**KS...**S**Q**SS**PI**TP**EG**GD**EN**TL**TL**LE**FP**VS**TS

810 820 830 840 850 860 870 880 890  
SARS-CoV-2 .**S**K**P**SR**RS**F**IED**LL**FN**K**V**IL**AD**AG**..**FI**K**Q**Y**GD**CL**GD**..**IA**ARD**L**IC**AO**K**FN**GL**V**LP**PL**L**TD**EM**IA**Q**Y**T**S**ALL**AG**TI**TS**GW**TF**GA**GA**AL**Q**IP**F  
SARS-CoV .**I**K**PT**TK**RS**F**IED**LL**FN**K**V**IL**AD**AG**..**FM**K**Q**Y**GF**CL**GD**..**IA**ARD**L**IC**AO**K**FN**GL**V**LP**PL**L**TD**EM**IA**Q**Y**T**S**ALL**AG**TI**TS**GW**TF**GA**GA**AL**Q**IP**F  
HCoV-OC43 CG**SS**SS**..**RS**LL**ED**LL**FN**K**V**K**L**SD**VG**..**F**VE**AY**NN**CT**GC**..SE**IR**DL**IC**VO**S**Y**K**GI**V**LP**PL**L**SE**Q**IS**GY**TL**AA**TS**AS**L**FP**P**WS**AA**AG**...**VP**F**  
HCoV-HKU1 CG**SS**SS**..**RS**LL**ED**LL**FN**K**V**K**L**SD**VG**..**F**VE**AY**NN**CT**GC**..SE**IR**DL**IC**VO**S**Y**K**GI**V**LP**PL**L**SE**Q**IS**GY**TL**AA**TS**AS**L**FP**P**WS**AA**AG**...**VP**F**  
HCoV-229E GS**RV**AG**RS**AI**ED**LL**FS**KL**V**TS**GL**TV**D**AD**Y**KK**CT**K**G**..LS**IA**DL**ACA**Q**Y**NG**IN**V**LP**GV**DA**DA**ERM**AM**Y**TS**GL**IG**IAL**GL**TS**AV**S**...**I**PF  
HCoV-NL63 SS**RI**AC**RS**AI**ED**LL**FS**KL**V**TS**GL**TV**D**AD**Y**KK**CT**K**G**..LS**IA**DL**ACA**Q**Y**NG**IN**V**LP**GV**DA**DA**ERM**AM**Y**TS**GL**IG**IAL**GL**TS**AV**S**...**I**PF  
MERS-CoV TG**SR**SS**RS**AI**ED**LL**FD**R**V**TI**AD**AG**..**Y**MO**Q**Y**DD**CM**Q**GP**AS**ARD**L**IC**AO**Y**V**AG**Y**V**LP**PL**MD**V**N**FE**AT**TS**LL**GS**IA**GV**GW**T**AG**L**SS**FA**AI**PF**

900 910 920 930 940 950 960 970  
SARS-CoV-2 AM**Q**MA**Y**RE**NG**IG**VT**Q**N**V**LY**EN**Q**K**L**IAN**Q**FN**S**AI**CK**IQ**DS**LS...**S**TAS**AL**CK**Q**OD**V**V**N**Q**NA**Q**AL**NT**IV**K**OL**S**SN**FG**AI**SS**VL**  
SARS-CoV AM**Q**MA**Y**RE**NG**IG**VT**Q**N**V**LY**EN**Q**K**L**IAN**Q**FN**S**AI**CK**IQ**ES**LT...**T**T**S**T**AL**GR**Q**OD**V**V**N**Q**NA**Q**AL**NT**IV**K**OL**S**SN**FG**AI**SS**VL**  
HCoV-OC43 YL**N**V**Q**Y**R**IN**GL**GV**TM**D**V**LS**Q**N**Q**K**L**IAN**AF**N**N**AL**Y**AI**Q**EG**FD**...**A**T**NS**AL**V**K**Q**AV**V**N**ANA**E**AL**N**N**L**Q**Q**L**SN**RR**FG**AI**SS**SL**  
HCoV-HKU1 SL**LV**Q**Y**R**IN**GL**GV**TM**D**V**LN**KN**Q**K**L**IAN**AF**N**N**AL**Y**AI**Q**EG**FT**...**A**T**NS**AL**AK**Q**S**V**V**N**ANA**Q**AL**NS**L**Q**Q**L**FN**KK**FG**AI**SS**SL  
HCoV-229E SL**AI**Q**AR**LD**NY**VA**L**Q**TD**V**L**Q**EN**Q**K**IL**AA**S**FN**K**AM**T**NI**V**DA**FT**GV**ND**AI**T**Q**TS**QA**L**Q**TV**AT**AL**N**K**Q**OD**V**V**N**Q**Q**GS**LN**HT**TS**Q**LR**Q**N**FO**AI**SS**SI**  
HCoV-NL63 SL**AL**Q**AR**LD**NY**VA**L**Q**TD**V**L**Q**EN**Q**K**IL**AA**S**FN**K**AM**T**NI**V**DA**FT**GV**ND**AI**T**Q**AE**AI**TH**TV**T**AL**N**K**Q**OD**V**V**N**Q**Q**GS**AL**N**HT**TS**Q**LR**Q**N**FO**AI**SS**SI**  
MERS-CoV AQ**SI**F**Y**RE**NG**VG**IT**Q**CV**LS**EN**Q**K**L**IAN**K**FN**Q**AL**GA**MQ**T**GT**FT...**T**T**N**SA**FR**K**V**Q**DA**V**NN**QA**ALS**LA**SE**L**NT**FG**AI**SS**SI**

980 990 1000 1010 1020 1030 1040 1050 1060 1070  
SARS-CoV-2 ND**IL**SR**LD**K**VE**AE**V**Q**LD**RL**IT**GR**L**Q**SL**Q**TY**VT**Q**OL**RA**AE**IR**ASAN**LA**AT**K**MS**EC**V**L**Q**S**K**R**V**Q**FC**GR**GV**HL**MS**FP**Q**S**APH**GV**VF**L**HT**Y**VP**E**  
SARS-CoV ND**IL**SR**LD**K**VE**AE**V**Q**LD**RL**IT**GR**L**Q**SL**Q**TY**VT**Q**OL**RA**AE**IR**ASAN**LA**AT**K**MS**EC**V**L**Q**S**K**R**V**Q**FC**GR**GV**HL**MS**FP**Q**S**APH**GV**VF**L**HT**Y**VP**E**  
HCoV-OC43 Q**E**IL**SR**LD**DA**LE**AE**AQ**LD**RL**ING**RL**TAL**NAY**S**Q**QL**SD**IT**L**K**AG**SA**Q**AME**K**V**NE**CV**K**S**Q**S**SR**IF**CG**NG**NH**IS**LV**Q**NAP**Y**GL**Y**FI**EF**SY**VP**E  
HCoV-HKU1 Q**E**IL**SR**LD**DA**LE**AE**AQ**LD**RL**ING**RL**TAL**NAY**S**Q**QL**SD**IT**L**K**AG**SA**Q**AME**K**V**NE**CV**K**S**Q**S**SR**IF**CG**NG**NH**IS**LV**Q**NAP**Y**GL**Y**FI**EF**SY**VP**E  
HCoV-229E QA**I**Y**DR**LD**IT**Q**AD**Q**Q**VD**RL**IT**GR**LA**AD**NV**FS**HT**L**K**Y**TE**VR**AS**QL**AQ**Q**K**V**NE**CV**K**S**Q**S**K**R**Y**FC**GN**TH**IS**IV**NA**AP**E**GL**VF**L**HT**Y**VP**E**  
HCoV-NL63 QA**I**Y**DR**LD**IS**Q**AD**Q**Q**VD**RL**IT**GR**LA**AD**NV**FS**Q**V**L**K**Y**TF**VR**GS**R**RL**AQ**Q**K**V**NE**CV**K**S**Q**S**N**R**Y**FC**GN**TH**IS**IV**NS**AP**D**GL**VF**L**HT**Y**VP**E**  
MERS-CoV GD**IT**Q**RI**LD**V**LE**Q**DA**Q**LD**RL**ING**RL**TT**NA**F**VA**Q**Q**VR**SE**SA**LS**AQ**L**AK**D**K**V**NE**CV**K**A**Q**S**K**R**SG**FC**Q**Q**GT**HI**YS**FP**V**N**AP**N**GL**Y**FM**H**VG**Y**YS

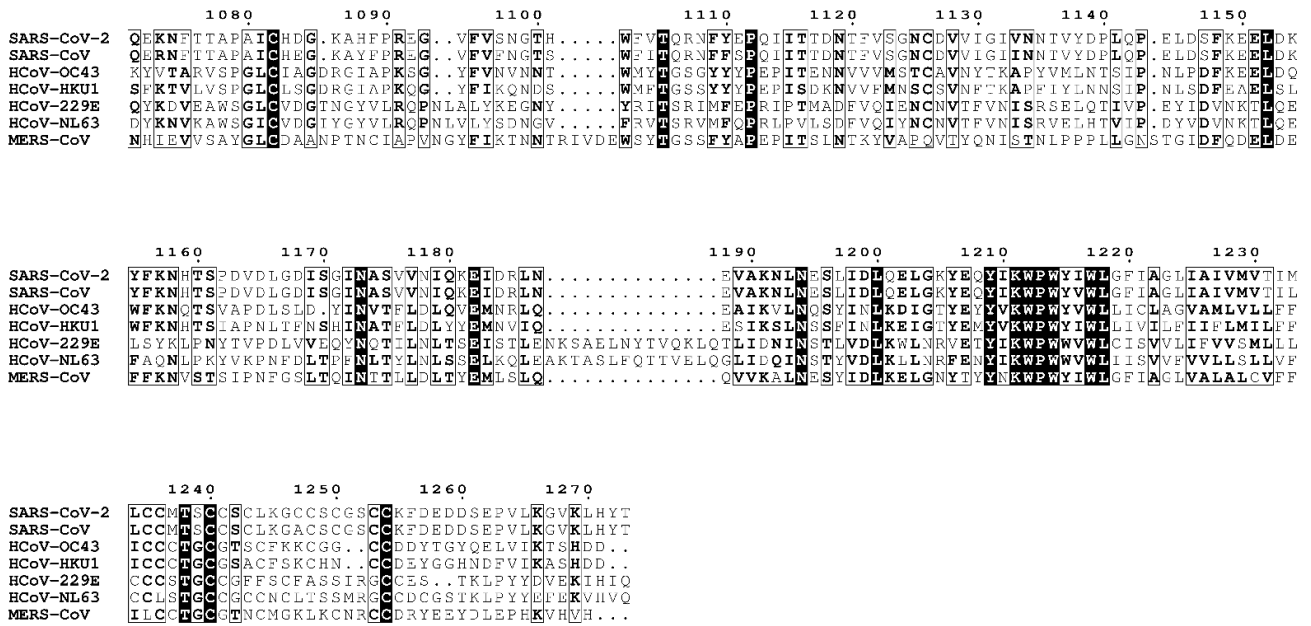

**Figure S5. Alignment of S protein of human coronaviruses.**

The sequence rcognized by 9E1 and corresponding sequences of other human coronaviruses S protein are marked in red color.

The sequence alignment was made by ESPrift 3.0. Swiss-Prot entry numbers for the sequences are P0DTC2 (SARS-CoV-2), P59594 (SARS-CoV), P36334 (HCoV-OC43), Q0ZME7 (HCoV-HKU1), P15423 (HCoV-229E), Q6Q1S2 (HCoV-NL63) and W6A028 (MERS-CoV) .
